# Supplementary material for: (DSF)n-graphene: a carbon semimetal with double stacking faults
Source: Royal Society of Chemistry journal article supplement (doi:10.1039/d1tc05849e), 2022-01-01
Supplement: d1tc05849e1.pdf [file d1tc05849e1.pdf]

## **Supplemental Material for “(DSF)<sub>n</sub>-graphene: carbon semimetal with double stacking faults”**

Juan Wei<sup>a</sup>, Weixiang Kong<sup>a</sup>, Xiaoliang Xiao<sup>a</sup>, Wangping Xu<sup>b</sup>, Rui Wang<sup>a</sup>, Li-Yong  
Gan<sup>a</sup>, Jing Fan<sup>c</sup>, and Xiaozhi Wu<sup>a,\*</sup>

<sup>a</sup>Institute for Structure and Function and Department of Physics, Chongqing  
University, Chongqing 401331, P. R. China

<sup>b</sup>Hunan Institute of Advanced Sensing and Information Technology, Xiangtan  
University, Xiangtan, Hunan 411105, P. R. China

<sup>c</sup>Center for Computational Science and Engineering, Southern University of Science  
and Technology, Shenzhen 518055, P. R. China

### **Method and computational details**

The first-principles calculations were carried out using the density functional theory (DFT) as implemented in the Vienna Ab initio Simulation Package (VASP)<sup>1,2</sup>. The generalized gradient approximation (GGA) in the form of the Perdew-Burke-Ernzerh (PBE)<sup>3</sup> was adopted for the exchange-correlation functional. The electron-ion interaction was designated by projector augmented wave (PAW) methods potentials<sup>4</sup>. Heyd-Scuseria-Ernzerhof (HSE06) function was used to predict more accurate electronic structure<sup>5</sup>. The energy cutoff employed for plane wave expansion of electron wave-function was set to 520 eV. The convergence criterion of total energy was set to be  $1 \times 10^{-6}$  eV and the thickness of the slab model was set to be larger than 16 Å to avoid spurious interaction between adjacent atom layers. Geometry optimization was executed until the remanent Hellmann-Feynman forces on the ions were less than 0.01 eV/Å. The Brillouin zone (BZ) of (DSF)<sub>3</sub>-graphene and (DSF)<sub>4</sub>-graphene were performed by using  $3 \times 11 \times 1$  and  $3 \times 13 \times 1$  Monkhorst-Pack sampling scheme k-point mesh<sup>6</sup>, and the dynamic stability of new structures has been examined by the phonon calculations and finite temperature molecular dynamics. Edge states were presented using the iterative Greens method<sup>7</sup> as implemented in the WANNIERTOOLS package.<sup>8</sup> We built the tight-binding (TB) Hamiltonian using

maximally localized Wannier functions (MLWF) methods by using the WANNIER90 package.<sup>9,10</sup>

**Table. S1** The corresponding total energies( $E_f$ ) and planar atomic density of the newly discovered and previously proposed carbon allotropes relative to graphene.

|                    | $E_f$<br>(eV/atom) | $\rho$<br>(atom/Å <sup>2</sup> ) |                               | $E_f$<br>(eV/atom) | $\rho$<br>(atom/Å <sup>2</sup> ) |
|--------------------|--------------------|----------------------------------|-------------------------------|--------------------|----------------------------------|
| graphene           | 0                  | 0.379                            | (DSF) <sub>1</sub> -graphene  | 0.4322             | 0.3528                           |
| graphyne           | 0.640              | 0.292                            | (DSF) <sub>2</sub> -graphene  | 0.3409             | 0.3588                           |
| BPC                | 0.630              | 0.304                            | (DSF) <sub>3</sub> -graphene  | 0.2806             | 0.3631                           |
| T-graphene         | 0.518              | 0.336                            | (DSF) <sub>4</sub> -graphene  | 0.2367             | 0.3659                           |
| New-C              | 0.469              | 0.353                            | (DSF) <sub>5</sub> -graphene  | 0.2049             | 0.3678                           |
| New-W              | 0.373              | 0.358                            | (DSF) <sub>6</sub> -graphene  | 0.1802             | 0.3693                           |
| Hopgraphene        | 0.25               | 0.361                            | (DSF) <sub>7</sub> -graphene  | 0.1611             | 0.3704                           |
| $\delta$ -graphene | 0.262              | 0.364                            | (DSF) <sub>8</sub> -graphene  | 0.1453             | 0.3713                           |
| Phagraphene        | 0.19               | 0.370                            | (DSF) <sub>9</sub> -graphene  | 0.1325             | 0.3720                           |
| $\psi$ -graphene   | 0.159              | 0.369                            | (DSF) <sub>10</sub> -graphene | 0.1220             | 0.3726                           |
| SW graphene        | 0.149              | 0.372                            | (DSF) <sub>11</sub> -graphene | 0.1129             | 0.3732                           |
| SW40               | 0.13               | 0.372                            | (DSF) <sub>12</sub> -graphene | 0.1048             | 0.3735                           |
|                    |                    |                                  | (DSF) <sub>13</sub> -graphene | 0.0983             | 0.3740                           |

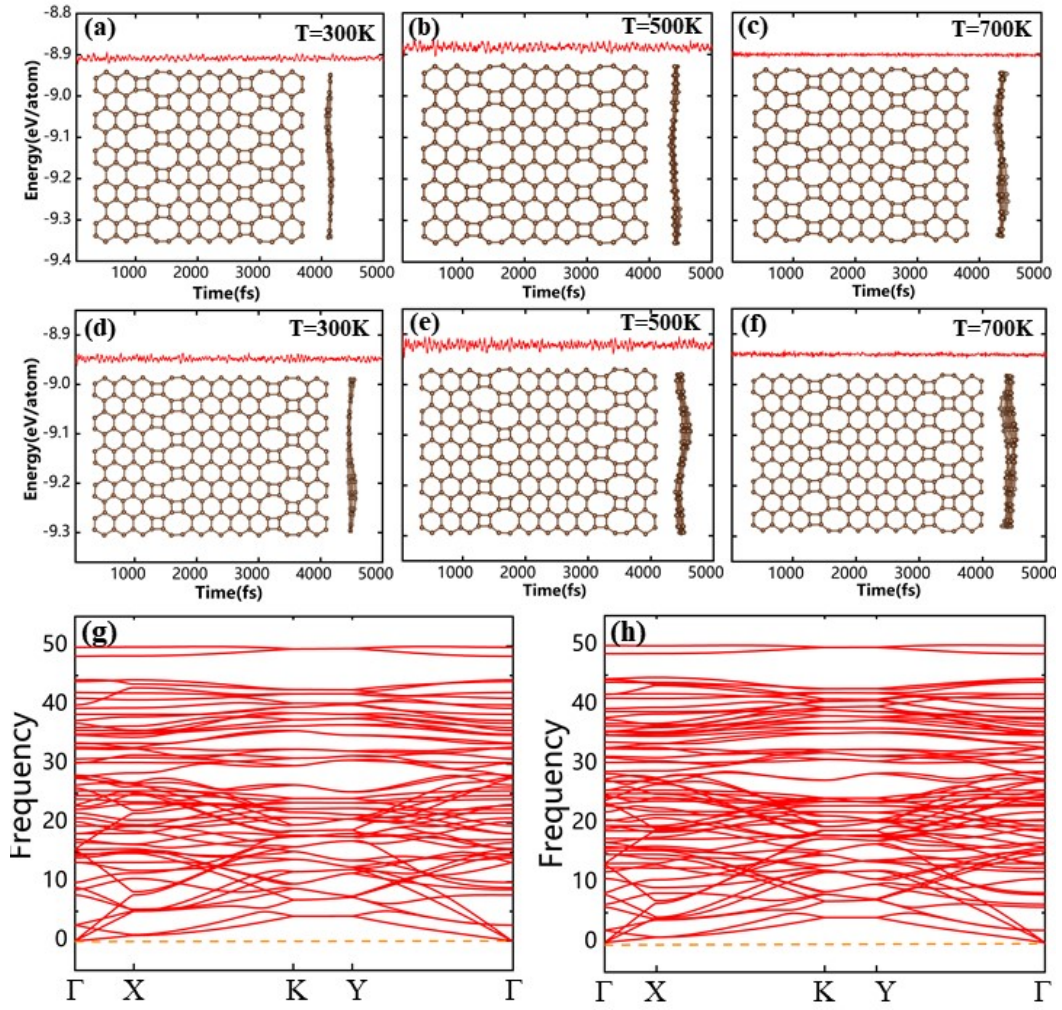

**Fig. S1** The molecular dynamics simulations under 300K (500 K and 700 K) and phonon dispersion, (a), (b) and (c) are (DSF)<sub>3</sub>-graphene, (d), (e) and (f) are (DSF)<sub>4</sub>-graphene, where (g) and (f) are the phonon spectrums of (DFS)<sub>3</sub>-graphene and (DSF)<sub>4</sub>-graphene, respectively.

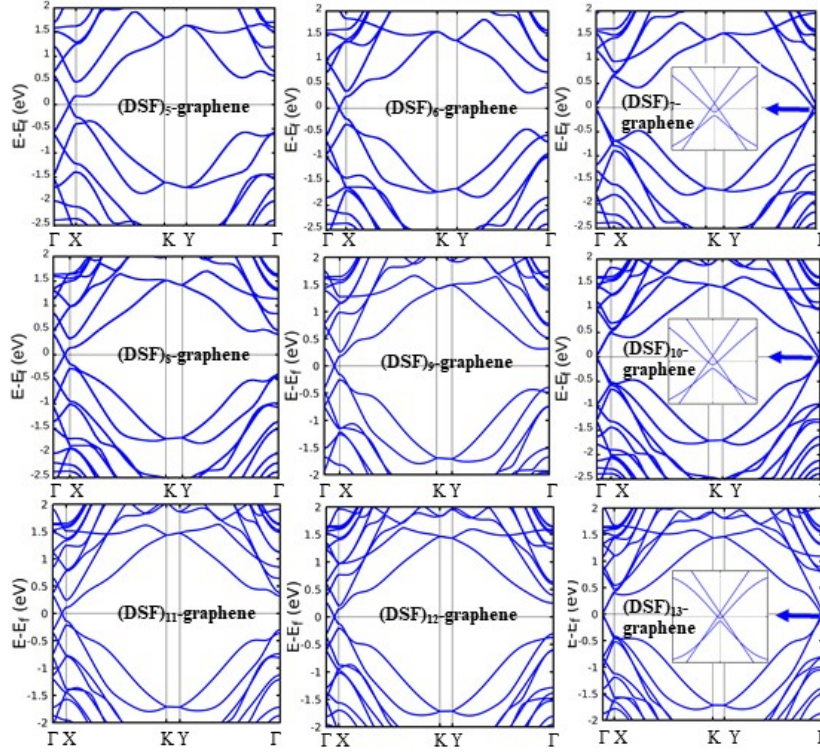

Fig. S2 The band structures of newly discovered carbon allotropes of  $(\text{DSF})_n$ -graphene, where  $n$  increases from 5 to 13. The band structures near the Dirac cones of  $(\text{DSF})_7$ -graphene,  $(\text{DSF})_{10}$ -graphene and  $(\text{DSF})_{13}$ -graphene are enlarged.

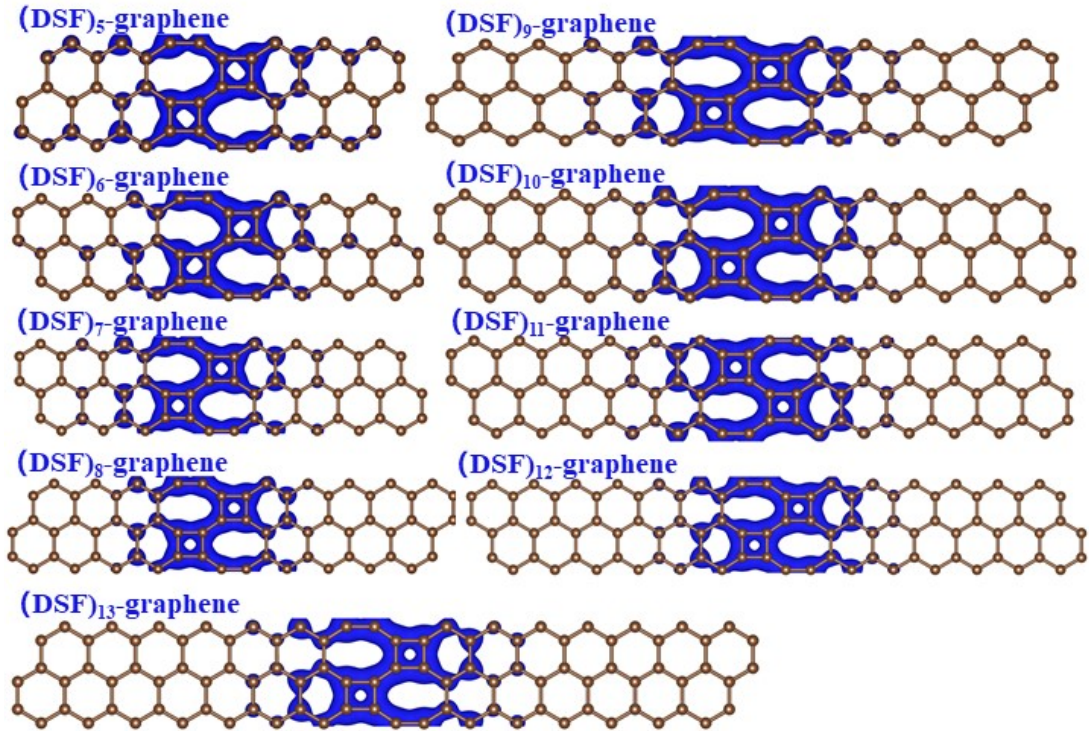

Fig. S3 The corresponding charge in the proximity of Dirac cone is major distributed at the grain boundary along the armchair direction.

## References

- [1] G. Kresse, J. Furthmuller, *Comp. Mater. Sci*, 1996, **6**, 15-50.
- [2] G. Kresse, J. Furthmuller, *Phys. Rev. B* 1996, **54**, 11169-11186.
- [3] J.P. Perdew, K. Burke, M. Ernzerhof, (vol 77, pg 3865, 1996), *Phys. Rev. Lett.*, 1997, **78**, 1396.
- [4] P.E. Blochl, *Phys. Rev. B*, 1994, **50**, 17953-17979.
- [5] J. Heyd, G.E. Scuseria, *J. Chem. Phys.*, 2004, **120**, 7274-7280.
- [6] J.D. Pack, H.J. Monkhorst, *Phys. Rev. B*, 1977, **16**, 1748-1749.
- [7] M.P.L. Sancho, J.M.L. Sancho, J. Rubio, *J. Phys. F: Met. Phys*, 1984, **14**, 1205-1215.
- [8] Q.S. Wu, S.N. Zhang, H.F. Song, M. Troyer, A.A. Soluyanov, *Comput. Phys. Commun.*, 2018, **224**, 405-416.
- [9] N. Marzari, A.A. Mostofi, J.R. Yates, I. Souza, D. Vanderbilt, *Rev. Mod. Phys.*, 2012, **84**, 1419-1475.
- [10] A.A. Mostofi, J.R. Yates, Y.S. Lee, I. Souza, D. Vanderbilt, N. Marzari, *Comput. Phys. Commun.*, 2008, **178**, 685-699.
